# Supplementary material for: RETRACTED: HOXA11-AS1 Promotes PD-L1-Mediated Immune Escape and Metastasis of Hypopharyngeal Carcinoma by Facilitating PTBP1 and FOSL1 Association
Source: MDPI journal article supplement (doi:10.3390/cancers14153694), 2022-07-29
Supplement: s1 [file s1]

**Table S1.** Association of HSCC characteristics and HOXA11-AS1 expression. High HOXA11-AS1 expression was correlated with lymph node metastasis, distant metastasis, and TNM stages.

| Variable                           | Hazard Ratio (95% CI) | <i>p</i> Value |
|------------------------------------|-----------------------|----------------|
| Tumor size (≥3 vs <3)              | 2.08 (1.45–5.07)      | 0.0278 *       |
| Lymphatic metastasis (N1–3 vs. N0) | 3.25 (2.16–5.92)      | 0.0108 *       |
| Lymphatic metastasis (Yes vs. NO)  | 5.36 (3.59–7.48)      | 0.0077 **      |
| TNM stage (III–IV vs. I–II)        | 4.55 (2.34–8.19)      | 0.0045 **      |
| HOXA11-AS1 (High vs. LOW)          | 3.92 (2.01–6.47)      | 0.0053 **      |

\*  $p < 0.05$ , \*\*  $p < 0.01$ .

**Table S2.** Univariate analysis of prognostic factors of HSCC patients ( $n = 40$ ).

|                      | HOXA11-AS1 |     | <i>p</i> Value |
|----------------------|------------|-----|----------------|
|                      | High       | Low |                |
| N, %                 | 16         | 24  | 0.1167         |
| Age                  |            |     |                |
| ≥60                  | 11         | 10  |                |
| <60                  | 5          | 14  | 0.0011 **      |
| Tumor size           |            |     |                |
| ≥3                   | 12         | 5   |                |
| <3                   | 4          | 19  | 0.0245 *       |
| Lymphatic metastasis |            |     |                |
| °N0                  | 6          | 18  |                |
| °N1–3                | 10         | 6   | 0.0225 *       |
| Distant metastasis   |            |     |                |
| NO                   | 4          | 16  |                |
| Yes                  | 12         | 8   | 0.0230 *       |
| TNM stage            |            |     |                |
| I or II              | 5          | 17  |                |
| III or IV            | 11         | 7   |                |

\*  $p < 0.05$ , \*\*  $p < 0.01$ .

**Table S3.** Multivariate analysis of independent prognostic factors of HSCC patients ( $n = 40$ ).

| Variable                           | Hazard Ratio (95% CI) | <i>p</i> Value |
|------------------------------------|-----------------------|----------------|
| Tumor size (≥3 vs <3)              | 1.88 (1.15–3.24)      | 0.0252 *       |
| Lymphatic metastasis (N1–3 vs. N0) | 2.93 (1.48–4.79)      | 0.0182 *       |
| Lymphatic metastasis (Yes vs. NO)  | 4.21 (2.26–6.23)      | 0.0327 *       |
| TNM stage (III–IV vs. I–II)        | 3.29 (1.98–6.87)      | 0.0041 **      |
| HOXA11-AS1 (High vs. LOW)          | 2.76 (1.86–5.27)      | 0.0122 *       |

\*  $p < 0.05$ , \*\*  $p < 0.01$ .
