# Supplementary figures and images for: RETRACTED: HOXA11-AS1 Promotes PD-L1-Mediated Immune Escape and Metastasis of Hypopharyngeal Carcinoma by Facilitating PTBP1 and FOSL1 Association
Source: MDPI journal article supplement (doi:10.3390/cancers14153694), 2022-07-29

# 1G

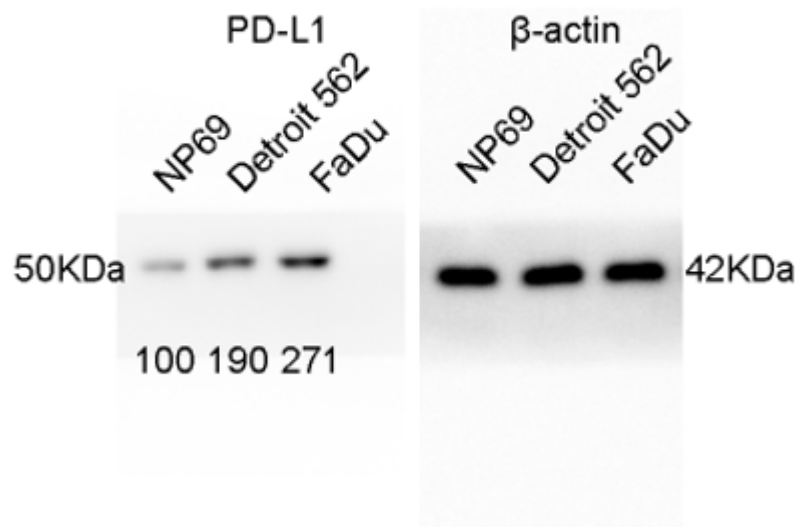

# 2B

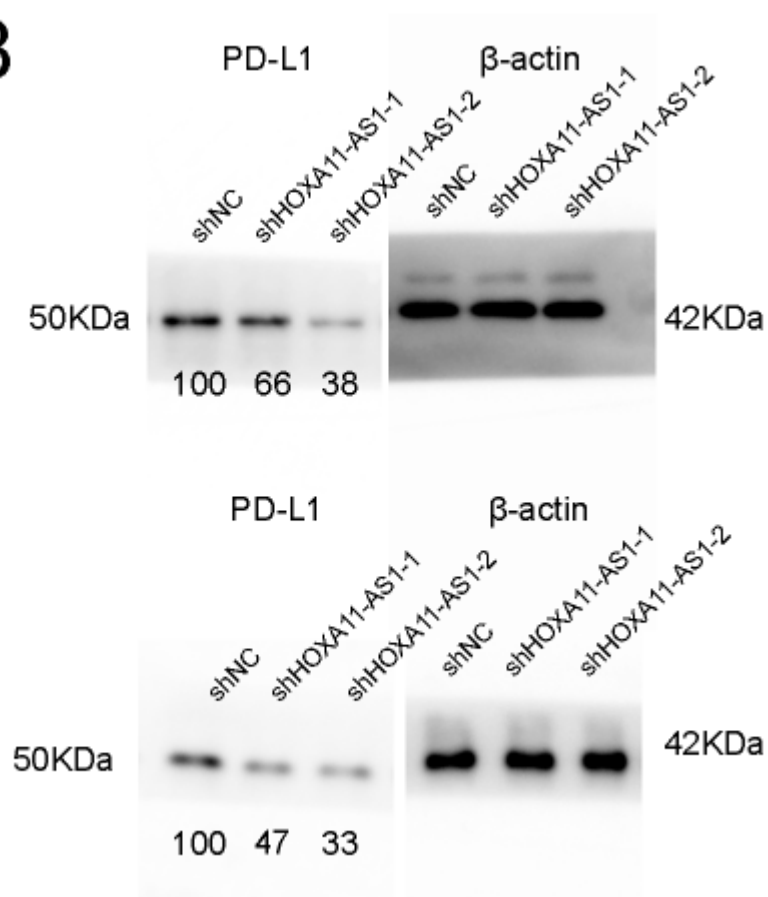

# 3A

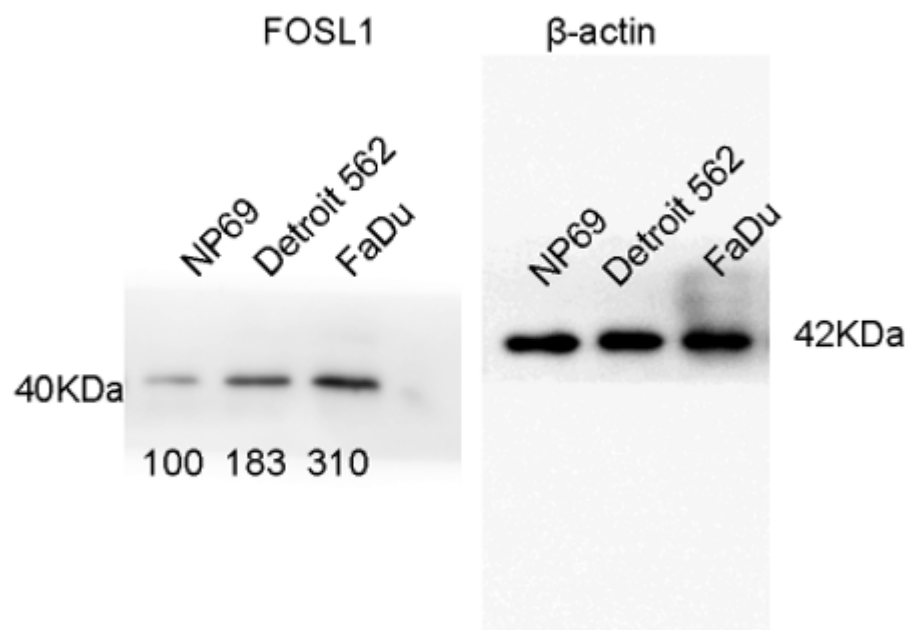

# 3B

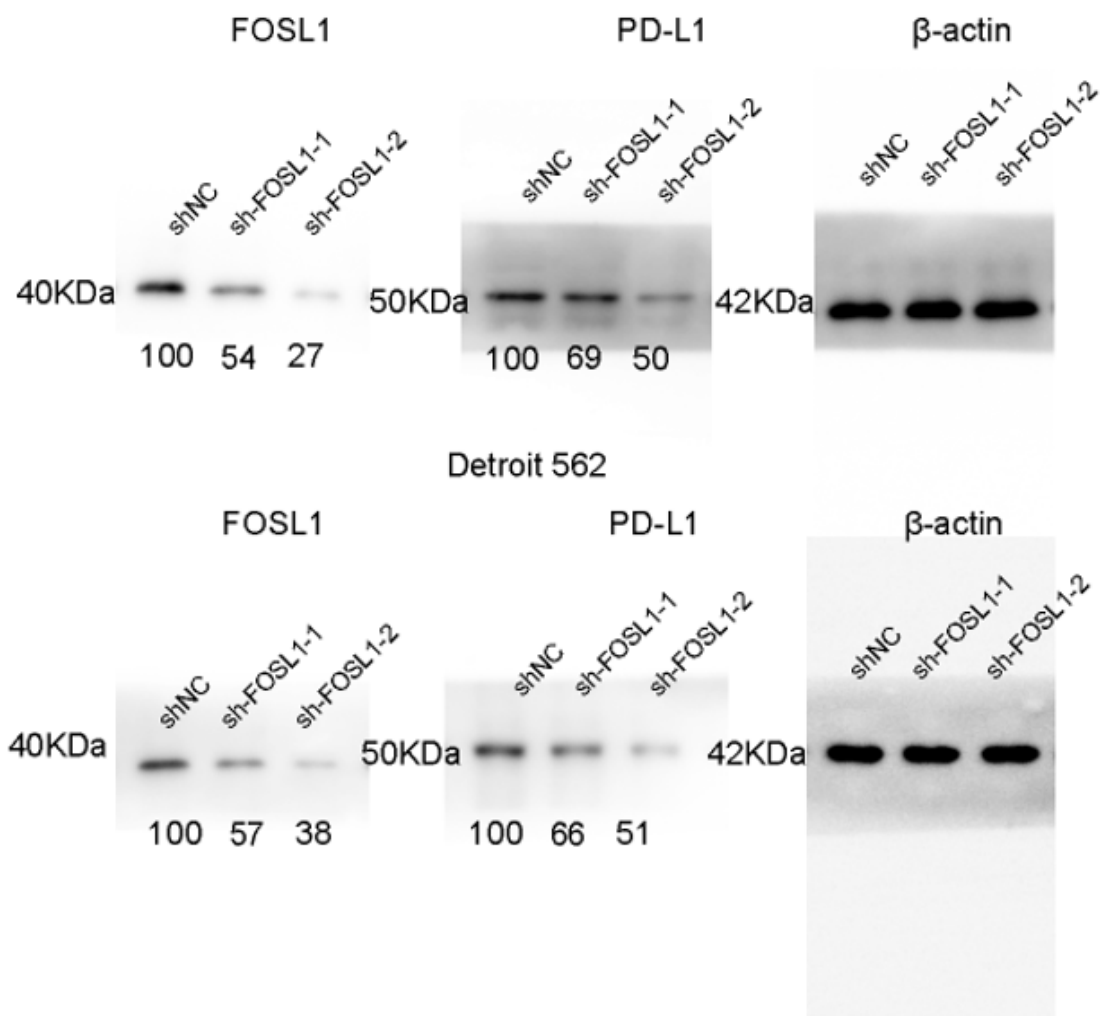

4B

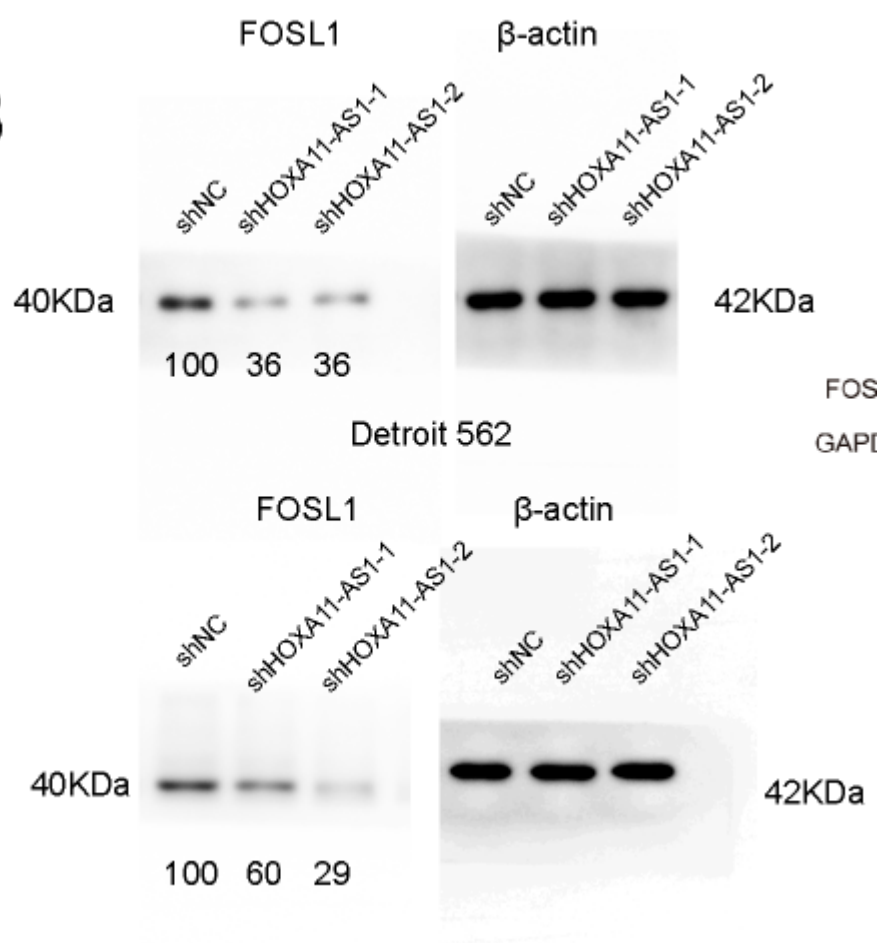

4E

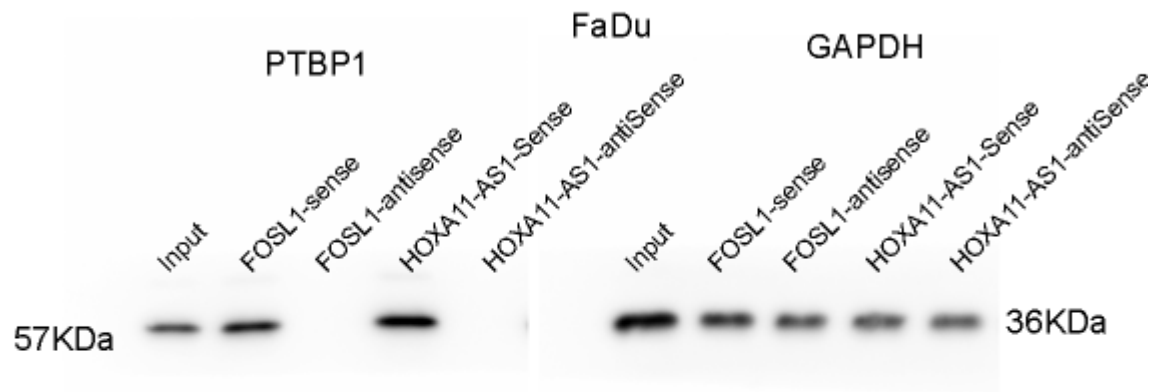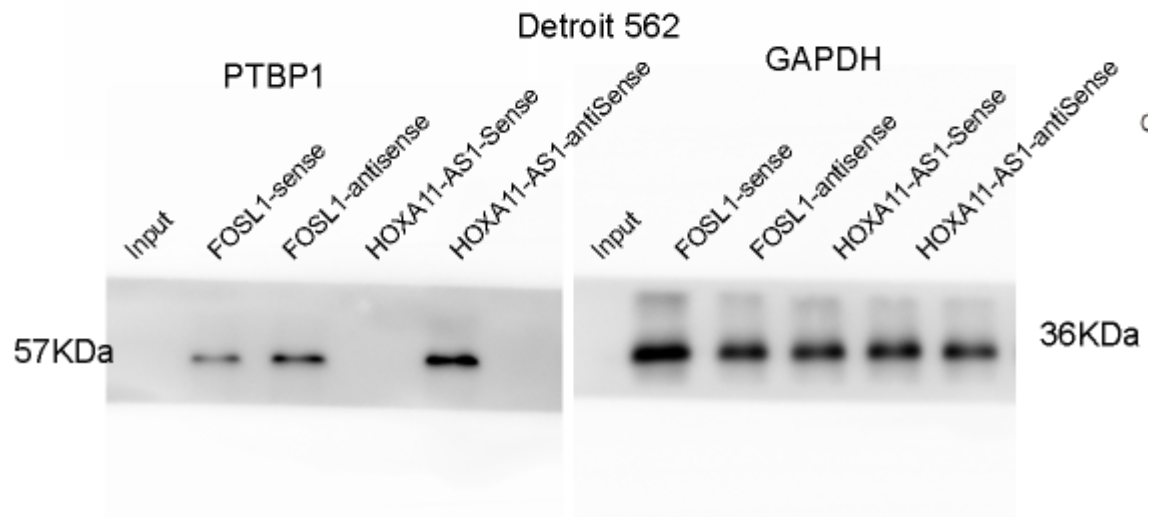

5A

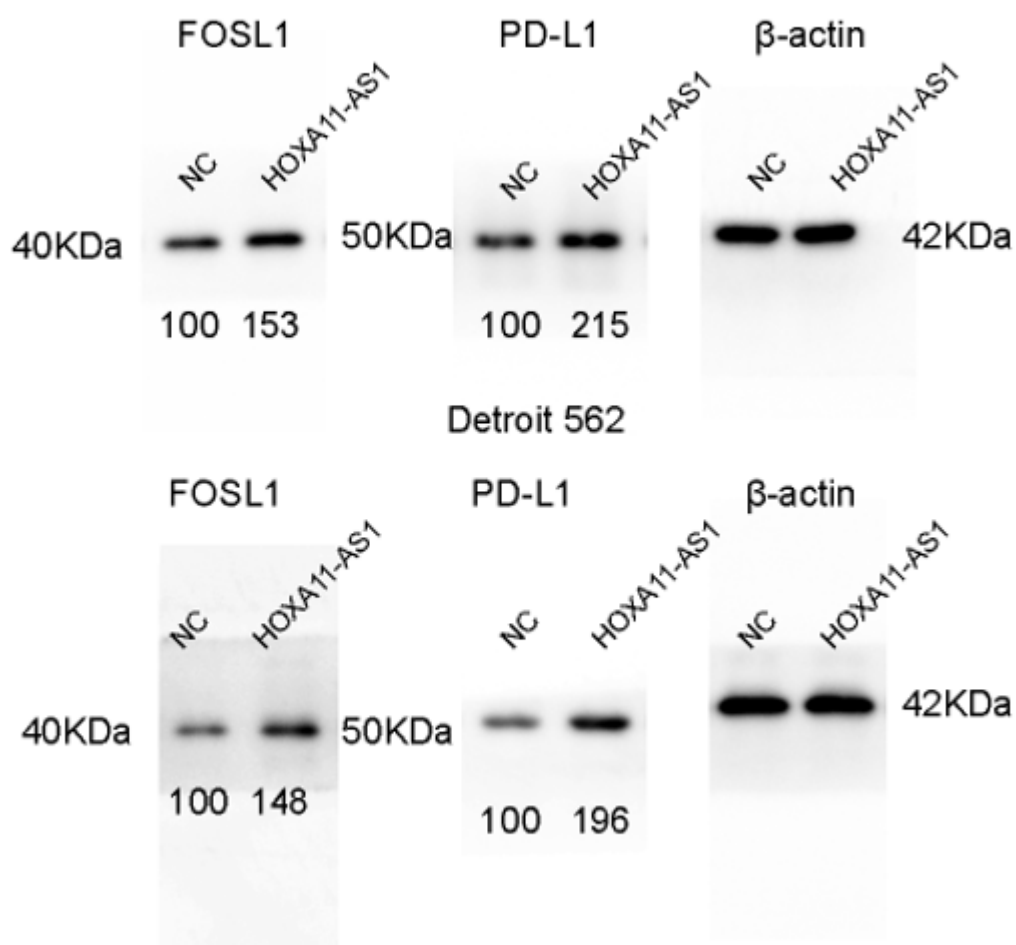

# 5B

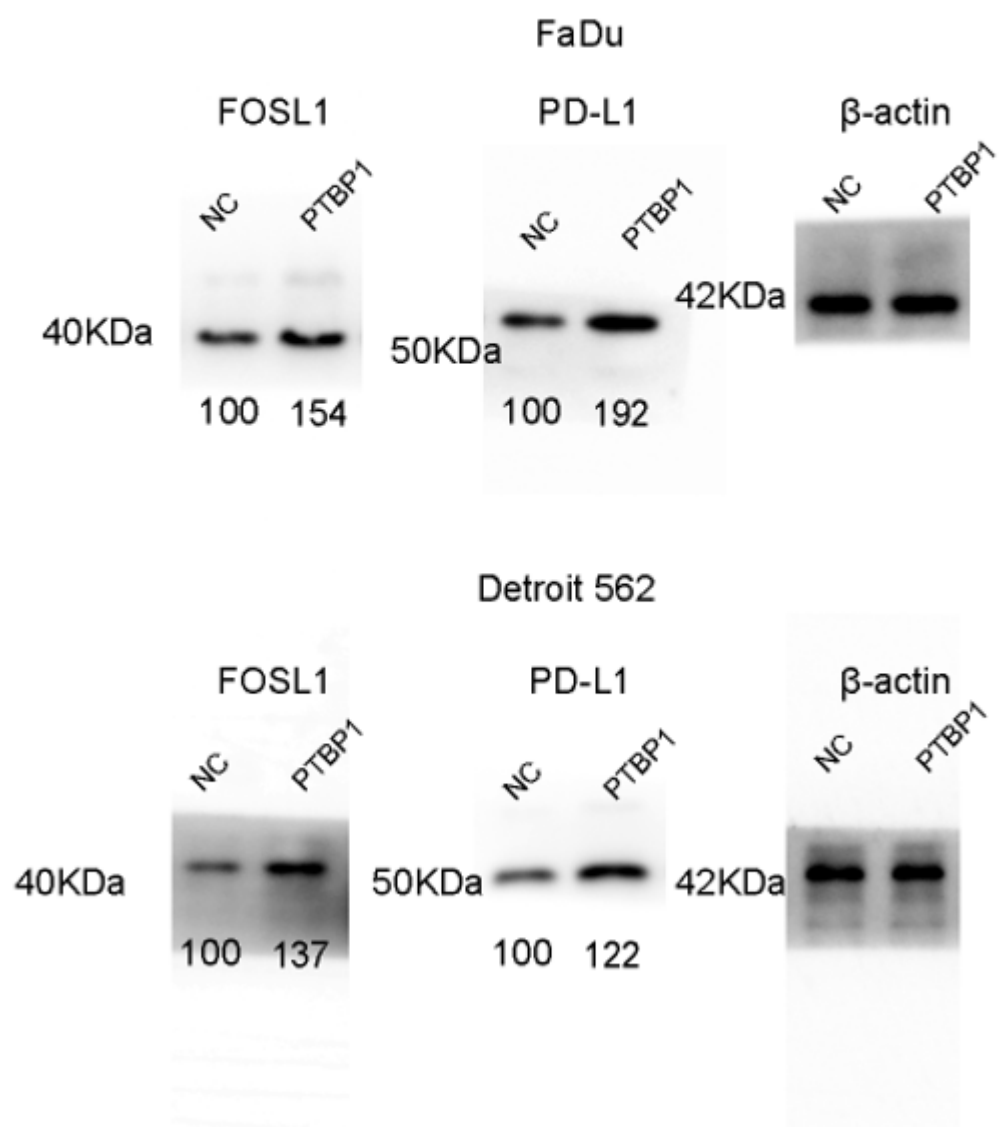

5C

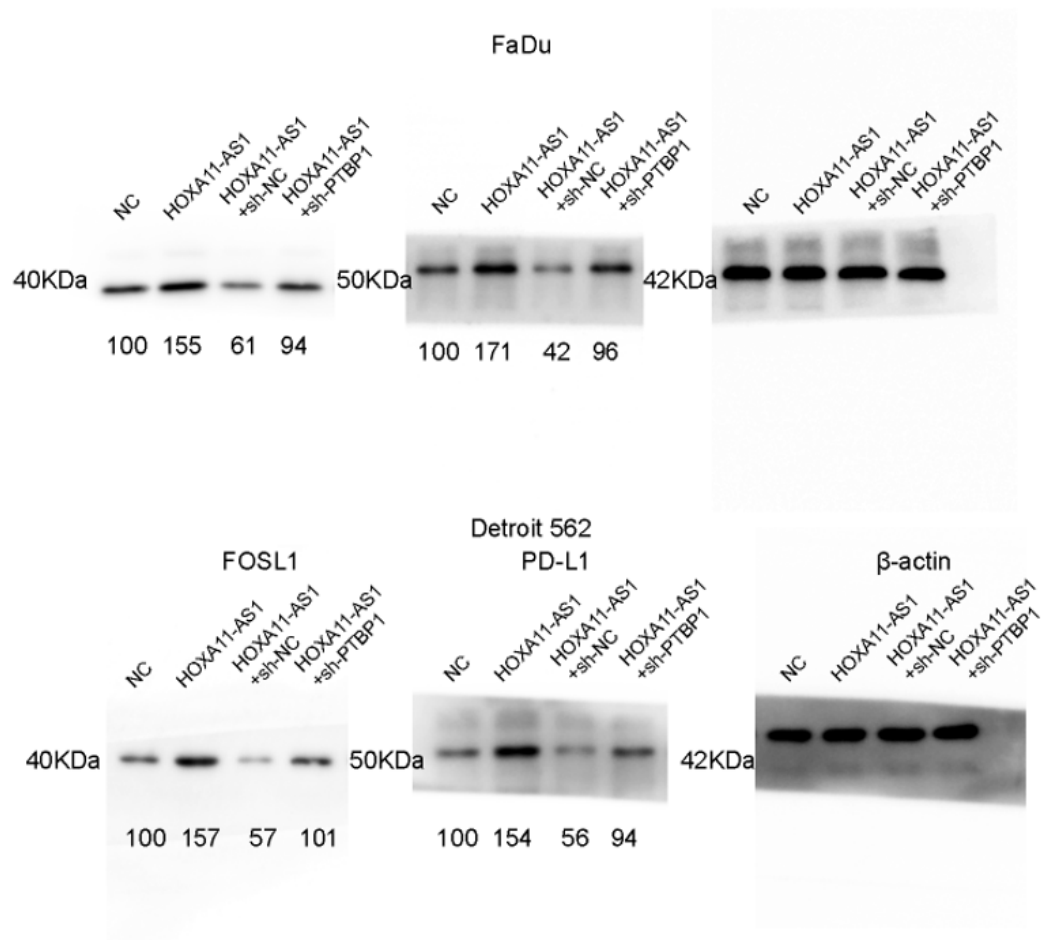



# 5D

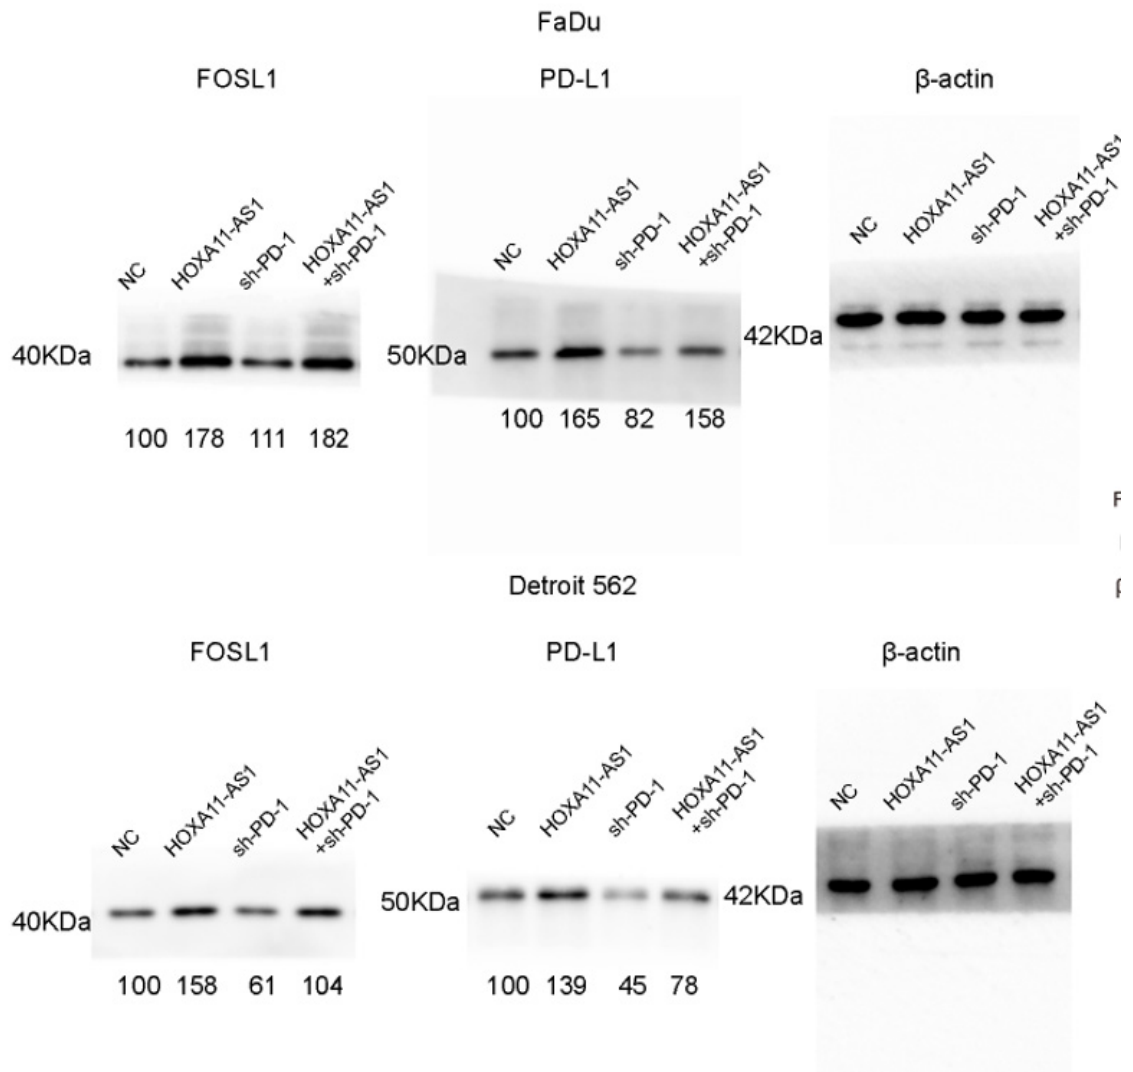

6G

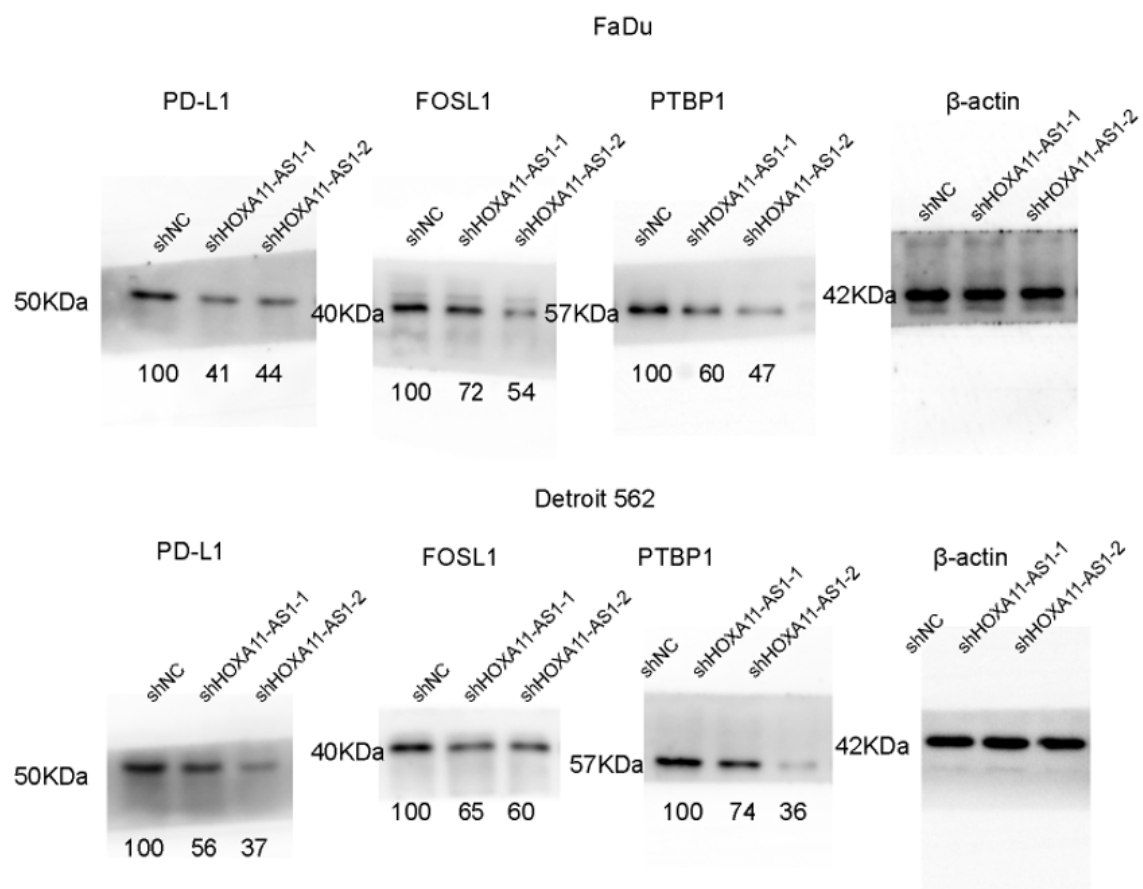

Supplement: s1 [file s1]
